# Supplementary material for: All the Pups We Cannot See: Cannibalism Masks Perinatal Death in Laboratory Mouse Breeding but Infanticide Is Rare
Source: Preprints.org preprint supplement (doi:10.20944/preprints202106.0659.v1), 2021-06-28
Supplement: Supplementary file 1 [file S1_DataObjective1.xlsx]

## Sheet: Data_Obj1
counting_method	cage_nb	Parity	social_housing	dob	nb_born	nb_weaned	total_dead	litter_loss
VIDEO_TRACK	1548	4	TRIO-NO_OVERLAP	2017-04-07	8	0	8	1
VIDEO_TRACK	1555	5	TRIO-NO_OVERLAP	2017-04-06	7	0	7	1
VIDEO_TRACK	1557	4	TRIO-NO_OVERLAP	2017-03-28	10	8	2	0
VIDEO_TRACK	1558	5	TRIO-NO_OVERLAP	2017-04-20	7	5	2	0
VIDEO_TRACK	1559	5	TRIO-NO_OVERLAP	2017-04-23	8	0	8	1
VIDEO_TRACK	1572	3	TRIO-NO_OVERLAP	2017-03-29	8	7	1	0
VIDEO_TRACK	1601	3	TRIO-NO_OVERLAP	2017-03-24	13	0	11	1
VIDEO_TRACK	1605	4	TRIO-NO_OVERLAP	2017-05-31	8	7	1	0
VIDEO_TRACK	1612	2	TRIO-NO_OVERLAP	2017-03-26	7	3	4	0
VIDEO_TRACK	1613	4	TRIO-NO_OVERLAP	2017-06-14	9	7	2	0
VIDEO_TRACK	1614	3	TRIO-NO_OVERLAP	2017-04-13	8	0	8	1
VIDEO_TRACK	1642	2	TRIO-NO_OVERLAP	2017-04-03	10	9	1	0
VIDEO_TRACK	1646	4	TRIO-NO_OVERLAP	2017-04-24	9	6	3	0
VIDEO_TRACK	1651	3	TRIO-NO_OVERLAP	2017-04-16	10	9	1	0
VIDEO_TRACK	1653	3	TRIO-NO_OVERLAP	2017-04-14	9	8	1	0
VIDEO_TRACK	1654	2	TRIO-NO_OVERLAP	2017-04-14	10	8	2	0
VIDEO_TRACK	1657	4	TRIO-NO_OVERLAP	2017-05-24	4	0	4	1
VIDEO_TRACK	1666	2	TRIO-NO_OVERLAP	2017-05-07	8	7	1	0
VIDEO_TRACK	1667	3	TRIO-NO_OVERLAP	2017-06-02	9	4	5	0
VIDEO_TRACK	1668	3	TRIO-NO_OVERLAP	2017-06-10	11	7	4	0
VIDEO_TRACK	1679	3	TRIO-NO_OVERLAP	2017-06-01	8	8	0	0
VIDEO_TRACK	1679	2	TRIO-NO_OVERLAP	2017-04-30	12	9	3	0
VIDEO_TRACK	1686	4	TRIO-NO_OVERLAP	2017-05-22	7	0	7	1
VIDEO_TRACK	1688	4	TRIO-NO_OVERLAP	2017-05-19	9	8	1	0
VIDEO_TRACK	1707	2	TRIO-NO_OVERLAP	2017-05-22	12	10	2	0
VIDEO_TRACK	1728	3	TRIO-NO_OVERLAP	2017-05-23	10	10	0	0
VIDEO_TRACK	1731	3	TRIO-NO_OVERLAP	2017-06-06	5	0	5	1
VIDEO_TRACK	1743	3	TRIO-NO_OVERLAP	2017-06-07	9	7	2	0
VIDEO_TRACK	1760	3	TRIO-NO_OVERLAP	2017-06-12	8	7	1	0
VIDEO_TRACK	1770	2	TRIO-NO_OVERLAP	2017-05-30	8	8	0	0
VIDEO_TRACK	1780	2	TRIO-NO_OVERLAP	2017-05-16	10	9	1	0
VIDEO_TRACK	1793	2	TRIO-NO_OVERLAP	2017-06-01	9	6	3	0
VIDEO_TRACK	1800	2	TRIO-NO_OVERLAP	2017-05-27	6	6	0	0
VIDEO_TRACK	1818	2	TRIO-NO_OVERLAP	2017-05-30	9	9	0	0
VIDEO_TRACK	1822	3	TRIO-NO_OVERLAP	2017-06-12	12	10	2	0
VIDEO_TRACK	1554	3	TRIO-OVERLAP	2017-03-27	6	0	6	1
VIDEO_TRACK	1573	3	TRIO-OVERLAP	2017-04-19	7	0	7	1
VIDEO_TRACK	1596	3	TRIO-OVERLAP	2017-03-30	9	0	9	1
VIDEO_TRACK	1597	4	TRIO-OVERLAP	2017-04-22	9	0	9	1
VIDEO_TRACK	1621	4	TRIO-OVERLAP	2017-05-10	11	0	11	1
VIDEO_TRACK	1621	3	TRIO-OVERLAP	2017-03-31	8	6	2	0
VIDEO_TRACK	1637	4	TRIO-OVERLAP	2017-05-17	9	3	6	0
VIDEO_TRACK	1638	2	TRIO-OVERLAP	2017-04-06	8.5	8.5	0	0
VIDEO_TRACK	1641	3	TRIO-OVERLAP	2017-04-27	10	9	1	0
VIDEO_TRACK	1642	3	TRIO-OVERLAP	2017-05-09	10	0	10	1
VIDEO_TRACK	1652	2	TRIO-OVERLAP	2017-05-02	9	0	9	1
VIDEO_TRACK	1653	2	TRIO-OVERLAP	2017-04-26	8	0	8	1
VIDEO_TRACK	1672	2	TRIO-OVERLAP	2017-04-20	10	6.5	3.5	0
VIDEO_TRACK	1682	3	TRIO-OVERLAP	2017-05-03	10	1	9	0
VIDEO_TRACK	1701	2	TRIO-OVERLAP	2017-05-05	8.5	4.5	4	0
VIDEO_TRACK	1703	3	TRIO-OVERLAP	2017-05-17	6	1	5	0
VIDEO_TRACK	1725	3	TRIO-OVERLAP	2017-06-04	10	0	10	1
VIDEO_TRACK	1740	4	TRIO-OVERLAP	2017-06-06	3	0	3	1
VIDEO_TRACK	1781	2	TRIO-OVERLAP	2017-05-27	9	9	0	0
VIDEO_TRACK	1828	3	TRIO-OVERLAP	2017-06-09	10	5	5	0
DAILY_CHECK	1548	5	TRIO-NO_OVERLAP	2017-06-09	5	1	4	0
DAILY_CHECK	1549	3	TRIO-NO_OVERLAP	2017-03-16	11	11	0	0
DAILY_CHECK	1549	4	TRIO-NO_OVERLAP	2017-04-29	11	2	9	0
DAILY_CHECK	1553	4	TRIO-NO_OVERLAP	2017-03-31	11	4	7	0
DAILY_CHECK	1553	5	TRIO-NO_OVERLAP	2017-05-12	1	0	1	1
DAILY_CHECK	1554	2	TRIO-NO_OVERLAP	2017-03-04	10	5	5	0
DAILY_CHECK	1554	5	TRIO-NO_OVERLAP	2017-05-13	11	10	1	0
DAILY_CHECK	1556	3	TRIO-NO_OVERLAP	2017-03-09	6	6	0	0
DAILY_CHECK	1556	4	TRIO-NO_OVERLAP	2017-04-23	5	5	0	0
DAILY_CHECK	1556	5	TRIO-NO_OVERLAP	2017-06-15	5	5	0	0
DAILY_CHECK	1557	3	TRIO-NO_OVERLAP	2017-03-01	6	3	3	0
DAILY_CHECK	1559	3	TRIO-NO_OVERLAP	2017-03-09	4	4	0	0
DAILY_CHECK	1559	4	TRIO-NO_OVERLAP	2017-04-01	5	5	0	0
DAILY_CHECK	1560	3	TRIO-NO_OVERLAP	2017-03-31	5	0	5	1
DAILY_CHECK	1573	2	TRIO-NO_OVERLAP	2017-03-07	11	8	3	0
DAILY_CHECK	1573	4	TRIO-NO_OVERLAP	2017-05-21	9	9	0	0
DAILY_CHECK	1590	4	TRIO-NO_OVERLAP	2017-05-12	5	5	0	0
DAILY_CHECK	1591	3	TRIO-NO_OVERLAP	2017-06-02	6	0	6	1
DAILY_CHECK	1597	2	TRIO-NO_OVERLAP	2017-03-17	6	6	0	0
DAILY_CHECK	1604	3	TRIO-NO_OVERLAP	2017-03-30	4	3	1	0
DAILY_CHECK	1605	3	TRIO-NO_OVERLAP	2017-05-11	1	0	1	1
DAILY_CHECK	1605	5	TRIO-NO_OVERLAP	2017-06-28	5	5	0	0
DAILY_CHECK	1612	4	TRIO-NO_OVERLAP	2017-05-20	1	0	1	1
DAILY_CHECK	1613	3	TRIO-NO_OVERLAP	2017-04-29	9	7	2	0
DAILY_CHECK	1615	2	TRIO-NO_OVERLAP	2017-04-13	5	0	5	1
DAILY_CHECK	1621	5	TRIO-NO_OVERLAP	2017-05-19	4	4	0	0
DAILY_CHECK	1636	2	TRIO-NO_OVERLAP	2017-03-26	2	0	2	1
DAILY_CHECK	1637	3	TRIO-NO_OVERLAP	2017-04-07	10	10	0	0
DAILY_CHECK	1641	2	TRIO-NO_OVERLAP	2017-04-03	10	9	1	0
DAILY_CHECK	1646	2	TRIO-NO_OVERLAP	2017-03-10	5	4	1	0
DAILY_CHECK	1646	3	TRIO-NO_OVERLAP	2017-04-01	7	7	0	0
DAILY_CHECK	1651	2	TRIO-NO_OVERLAP	2017-03-25	8	7	1	0
DAILY_CHECK	1651	4	TRIO-NO_OVERLAP	2017-05-09	9	7	2	0
DAILY_CHECK	1654	3	TRIO-NO_OVERLAP	2017-05-08	9	7	2	0
DAILY_CHECK	1657	2	TRIO-NO_OVERLAP	2017-04-11	4	0	4	1
DAILY_CHECK	1658	2	TRIO-NO_OVERLAP	2017-04-16	9	7	2	0
DAILY_CHECK	1666	3	TRIO-NO_OVERLAP	2017-06-02	8	5	3	0
DAILY_CHECK	1668	2	TRIO-NO_OVERLAP	2017-05-01	10	10	0	0
DAILY_CHECK	1669	2	TRIO-NO_OVERLAP	2017-06-10	10	7	3	0
DAILY_CHECK	1672	3	TRIO-NO_OVERLAP	2017-06-03	11	11	0	0
DAILY_CHECK	1673	2	TRIO-NO_OVERLAP	2017-05-13	8	4	4	0
DAILY_CHECK	1678	2	TRIO-NO_OVERLAP	2017-04-30	12	9	3	0
DAILY_CHECK	1678	4	TRIO-NO_OVERLAP	2017-06-01	8	8	0	0
DAILY_CHECK	1682	2	TRIO-NO_OVERLAP	2017-04-14	3	3	0	0
DAILY_CHECK	1682	4	TRIO-NO_OVERLAP	2017-06-16	7	6	1	0
DAILY_CHECK	1687	2	TRIO-NO_OVERLAP	2017-04-09	6	4	2	0
DAILY_CHECK	1687	3	TRIO-NO_OVERLAP	2017-06-06	7	7	0	0
DAILY_CHECK	1688	5	TRIO-NO_OVERLAP	2017-06-25	9	6	3	0
DAILY_CHECK	1689	3	TRIO-NO_OVERLAP	2017-06-12	7	0	7	1
DAILY_CHECK	1701	3	TRIO-NO_OVERLAP	2017-05-30	1	0	1	1
DAILY_CHECK	1702	3	TRIO-NO_OVERLAP	2017-06-14	11	11	0	0
DAILY_CHECK	1704	3	TRIO-NO_OVERLAP	2017-06-10	5	5	0	0
DAILY_CHECK	1707	3	TRIO-NO_OVERLAP	2017-06-15	4	2	2	0
DAILY_CHECK	1724	2	TRIO-NO_OVERLAP	2017-04-22	1	0	1	1
DAILY_CHECK	1725	2	TRIO-NO_OVERLAP	2017-05-13	12	12	0	0
DAILY_CHECK	1728	2	TRIO-NO_OVERLAP	2017-04-26	3	0	3	1
DAILY_CHECK	1729	2	TRIO-NO_OVERLAP	2017-06-17	5	3	2	0
DAILY_CHECK	1732	3	TRIO-NO_OVERLAP	2017-06-20	2	2	0	0
DAILY_CHECK	1739	3	TRIO-NO_OVERLAP	2017-05-26	10	8	2	0
DAILY_CHECK	1739	4	TRIO-NO_OVERLAP	2017-06-19	10	10	0	0
DAILY_CHECK	1744	2	TRIO-NO_OVERLAP	2017-06-07	8	7	1	0
DAILY_CHECK	1760	2	TRIO-NO_OVERLAP	2017-04-30	1	0	1	1
DAILY_CHECK	1761	3	TRIO-NO_OVERLAP	2017-05-20	8	8	0	0
DAILY_CHECK	1781	3	TRIO-NO_OVERLAP	2017-06-23	7	6	1	0
DAILY_CHECK	1782	2	TRIO-NO_OVERLAP	2017-05-28	10	10	0	0
DAILY_CHECK	1794	2	TRIO-NO_OVERLAP	2017-06-01	13	13	0	0
DAILY_CHECK	1799	4	TRIO-NO_OVERLAP	2017-06-30	8	8	0	0
DAILY_CHECK	1817	2	TRIO-NO_OVERLAP	2017-05-24	6	0	6	1
DAILY_CHECK	1553	3	TRIO-OVERLAP	2017-03-07	8	8	0	0
DAILY_CHECK	1554	4	TRIO-OVERLAP	2017-04-19	5	0	5	1
DAILY_CHECK	1555	4	TRIO-OVERLAP	2017-03-16	8	8	0	0
DAILY_CHECK	1557	5	TRIO-OVERLAP	2017-05-04	3	0	3	1
DAILY_CHECK	1558	3	TRIO-OVERLAP	2017-03-22	2	0	2	1
DAILY_CHECK	1558	4	TRIO-OVERLAP	2017-04-11	5	0	5	1
DAILY_CHECK	1572	4	TRIO-OVERLAP	2017-04-20	7	0	7	1
DAILY_CHECK	1572	5	TRIO-OVERLAP	2017-06-02	3	0	3	1
DAILY_CHECK	1573	5	TRIO-OVERLAP	2017-06-12	9	7	2	0
DAILY_CHECK	1590	5	TRIO-OVERLAP	2017-06-05	1	0	1	1
DAILY_CHECK	1590	2	TRIO-OVERLAP	2017-03-23	10	5	5	0
DAILY_CHECK	1596	4	TRIO-OVERLAP	2017-04-23	5	0	5	1
DAILY_CHECK	1596	5	TRIO-OVERLAP	2017-05-22	7	7	0	0
DAILY_CHECK	1597	3	TRIO-OVERLAP	2017-04-07	8	5	3	0
DAILY_CHECK	1597	5	TRIO-OVERLAP	2017-06-06	2	0	2	1
DAILY_CHECK	1604	5	TRIO-OVERLAP	2017-04-17	5	4	1	0
DAILY_CHECK	1605	2	TRIO-OVERLAP	2017-03-09	8	0	8	1
DAILY_CHECK	1612	3	TRIO-OVERLAP	2017-04-17	2	0	2	1
DAILY_CHECK	1613	2	TRIO-OVERLAP	2017-04-07	8	7	1	0
DAILY_CHECK	1614	2	TRIO-OVERLAP	2017-03-24	10	10	0	0
DAILY_CHECK	1637	2	TRIO-OVERLAP	2017-03-18	4	0	4	1
DAILY_CHECK	1637	5	TRIO-OVERLAP	2017-05-27	3	3	0	0
DAILY_CHECK	1638	3	TRIO-OVERLAP	2017-05-18	9	3	6	0
DAILY_CHECK	1638	4	TRIO-OVERLAP	2017-06-09	8	8	0	0
DAILY_CHECK	1646	5	TRIO-OVERLAP	2017-06-01	9	0	9	1
DAILY_CHECK	1651	5	TRIO-OVERLAP	2017-05-31	1	0	1	1
DAILY_CHECK	1652	3	TRIO-OVERLAP	2017-05-27	1	0	1	1
DAILY_CHECK	1652	4	TRIO-OVERLAP	2017-06-26	2	0	2	1
DAILY_CHECK	1653	2	TRIO-OVERLAP	2017-03-23	1	0	1	1
DAILY_CHECK	1657	3	TRIO-OVERLAP	2017-05-02	4	4	0	0
DAILY_CHECK	1658	3	TRIO-OVERLAP	2017-06-24	6	6	0	0
DAILY_CHECK	1667	2	TRIO-OVERLAP	2017-05-10	7	7	0	0
DAILY_CHECK	1673	3	TRIO-OVERLAP	2017-06-24	6	6	0	0
DAILY_CHECK	1678	3	TRIO-OVERLAP	2017-05-25	2	0	2	1
DAILY_CHECK	1683	4	TRIO-OVERLAP	2017-06-19	8	8	0	0
DAILY_CHECK	1683	2	TRIO-OVERLAP	2017-04-05	7	0	7	1
DAILY_CHECK	1683	3	TRIO-OVERLAP	2017-05-04	9	1	8	0
DAILY_CHECK	1686	5	TRIO-OVERLAP	2017-06-12	6	3	3	0
DAILY_CHECK	1686	2	TRIO-OVERLAP	2017-04-07	1	0	1	1
DAILY_CHECK	1686	3	TRIO-OVERLAP	2017-04-26	8	8	0	0
DAILY_CHECK	1688	2	TRIO-OVERLAP	2017-04-07	2	2	0	0
DAILY_CHECK	1688	3	TRIO-OVERLAP	2017-04-27	8	8	0	0
DAILY_CHECK	1689	2	TRIO-OVERLAP	2017-04-19	4	2	2	0
DAILY_CHECK	1701	4	TRIO-OVERLAP	2017-06-21	4	0	4	1
DAILY_CHECK	1702	2	TRIO-OVERLAP	2017-05-06	11	9	2	0
DAILY_CHECK	1703	2	TRIO-OVERLAP	2017-04-21	8	0	8	1
DAILY_CHECK	1703	4	TRIO-OVERLAP	2017-06-25	9	5	4	0
DAILY_CHECK	1704	2	TRIO-OVERLAP	2017-04-25	9	8	1	0
DAILY_CHECK	1708	2	TRIO-OVERLAP	2017-06-05	7	0	7	1
DAILY_CHECK	1708	3	TRIO-OVERLAP	2017-06-27	9	8	1	0
DAILY_CHECK	1724	3	TRIO-OVERLAP	2017-05-17	8	8	0	0
DAILY_CHECK	1728	4	TRIO-OVERLAP	2017-06-24	3	3	0	0
DAILY_CHECK	1731	2	TRIO-OVERLAP	2017-05-13	8	5	3	0
DAILY_CHECK	1731	4	TRIO-OVERLAP	2017-06-26	4	4	0	0
DAILY_CHECK	1732	2	TRIO-OVERLAP	2017-05-30	6	0	6	1
DAILY_CHECK	1739	2	TRIO-OVERLAP	2017-04-24	2	0	2	1
DAILY_CHECK	1740	2	TRIO-OVERLAP	2017-04-25	2	2	0	0
DAILY_CHECK	1740	3	TRIO-OVERLAP	2017-05-16	4	0	4	1
DAILY_CHECK	1743	2	TRIO-OVERLAP	2017-05-16	8	7	1	0
DAILY_CHECK	1761	2	TRIO-OVERLAP	2017-04-23	5	0	5	1
DAILY_CHECK	1769	3	TRIO-OVERLAP	2017-06-07	9	7	2	0
DAILY_CHECK	1769	2	TRIO-OVERLAP	2017-05-02	6	0	6	1
DAILY_CHECK	1779	2	TRIO-OVERLAP	2017-05-23	7	7	0	0
DAILY_CHECK	1780	3	TRIO-OVERLAP	2017-06-10	9	0	9	1
DAILY_CHECK	1799	2	TRIO-OVERLAP	2017-05-08	1	0	1	1
DAILY_CHECK	1799	3	TRIO-OVERLAP	2017-06-07	11	9	2	0
DAILY_CHECK	1800	3	TRIO-OVERLAP	2017-06-18	5	0	5	1
DAILY_CHECK	1817	3	TRIO-OVERLAP	2017-06-21	7	7	0	0
DAILY_CHECK	1828	2	TRIO-OVERLAP	2017-05-19	5	1	4	0
DAILY_CHECK	1829	2	TRIO-OVERLAP	2017-05-30	10	2	8	0
