# Supplementary material for: All the Pups We Cannot See: Cannibalism Masks Perinatal Death in Laboratory Mouse Breeding but Infanticide Is Rare
Source: Preprints.org preprint supplement (doi:10.20944/preprints202106.0659.v1), 2021-06-28
Supplement: Supplementary file 2 [file S2_DataObjectives2,3.xlsx]

## Sheet: Data_obj2,3
social_housing	cage_id	pup_id	dob	situation	dod	infanticide
SOLO	71020	g2p1	2017-03-25	cannibalism	0	no
SOLO	71020	g2p2	2017-03-25	cannibalism	4	no
SOLO	71020	g2p3	2017-03-25	alive	.	.
SOLO	66523	g4p1	2017-04-12	cannibalism	0	no
SOLO	66523	g4p10	2017-04-12	alive	.	.
SOLO	66523	g4p11	2017-04-12	alive	.	.
SOLO	66523	g4p12	2017-04-12	alive	.	.
SOLO	66523	g4p13	2017-04-12	alive	.	.
SOLO	66523	g4p2	2017-04-12	cannibalism	0	no
SOLO	66523	g4p3	2017-04-12	cannibalism	1	not_detected
SOLO	66523	g4p4	2017-04-12	found_dead	1	.
SOLO	66523	g4p5	2017-04-12	alive	.	.
SOLO	66523	g4p6	2017-04-12	alive	.	.
SOLO	66523	g4p7	2017-04-12	alive	.	.
SOLO	66523	g4p8	2017-04-12	alive	.	.
SOLO	66523	g4p9	2017-04-12	alive	.	.
SOLO	70422	g10p1	2017-03-31	alive	.	.
SOLO	70422	g10p2	2017-03-31	alive	.	.
SOLO	70422	g10p3	2017-03-31	alive	.	.
SOLO	70422	g10p4	2017-03-31	alive	.	.
SOLO	70422	g10p5	2017-03-31	alive	.	.
SOLO	70422	g10p6	2017-03-31	alive	.	.
SOLO	70422	g10p7	2017-03-31	alive	.	.
SOLO	70422	g10p8	2017-03-31	alive	.	.
SOLO	70422	g10p9	2017-03-31	alive	.	.
SOLO	66460	g13p1	2017-03-31	found_dead	0	.
SOLO	66460	g13p10	2017-03-31	alive	.	.
SOLO	66460	g13p11	2017-03-31	alive	.	.
SOLO	66460	g13p2	2017-03-31	found_dead	0	.
SOLO	66460	g13p3	2017-03-31	found_dead	0	.
SOLO	66460	g13p4	2017-03-31	found_dead	0	.
SOLO	66460	g13p5	2017-03-31	found_dead	0	.
SOLO	66460	g13p6	2017-03-31	found_dead	2	.
SOLO	66460	g13p7	2017-03-31	found_dead	2	.
SOLO	66460	g13p8	2017-03-31	alive	.	.
SOLO	66460	g13p9	2017-03-31	alive	.	.
SOLO	71019	g14p1	2017-03-30	found_dead	0	.
SOLO	71019	g14p10	2017-03-30	alive	.	.
SOLO	71019	g14p11	2017-03-30	alive	.	.
SOLO	71019	g14p2	2017-03-30	alive	.	.
SOLO	71019	g14p3	2017-03-30	alive	.	.
SOLO	71019	g14p4	2017-03-30	alive	.	.
SOLO	71019	g14p5	2017-03-30	alive	.	.
SOLO	71019	g14p6	2017-03-30	alive	.	.
SOLO	71019	g14p7	2017-03-30	alive	.	.
SOLO	71019	g14p8	2017-03-30	alive	.	.
SOLO	71019	g14p9	2017-03-30	alive	.	.
SOLO	66522	g15p1	2017-03-31	cannibalism	2	not_detected
SOLO	66522	g15p2	2017-03-31	found_dead	0	.
SOLO	66522	g15p3	2017-03-31	found_dead	0	.
SOLO	66522	g15p4	2017-03-31	found_dead	0	.
SOLO	66522	g15p5	2017-03-31	found_dead	2	.
SOLO	69340	g16p1	2017-04-07	found_dead	0	.
SOLO	69340	g16p10	2017-04-07	alive	.	.
SOLO	69340	g16p11	2017-04-07	alive	.	.
SOLO	69340	g16p12	2017-04-07	alive	.	.
SOLO	69340	g16p13	2017-04-07	alive	.	.
SOLO	69340	g16p14	2017-04-07	alive	.	.
SOLO	69340	g16p2	2017-04-07	found_dead	0	.
SOLO	69340	g16p3	2017-04-07	found_dead	0	.
SOLO	69340	g16p4	2017-04-07	found_dead	0	.
SOLO	69340	g16p5	2017-04-07	found_dead	0	.
SOLO	69340	g16p6	2017-04-07	found_dead	1	.
SOLO	69340	g16p7	2017-04-07	alive	.	.
SOLO	69340	g16p8	2017-04-07	alive	.	.
SOLO	69340	g16p9	2017-04-07	alive	.	.
SOLO	71483	g17p1	2017-04-05	found_dead	2	.
SOLO	71483	g17p10	2017-04-05	alive	.	.
SOLO	71483	g17p11	2017-04-05	alive	.	.
SOLO	71483	g17p12	2017-04-05	alive	.	.
SOLO	71483	g17p2	2017-04-05	alive	.	.
SOLO	71483	g17p3	2017-04-05	alive	.	.
SOLO	71483	g17p4	2017-04-05	alive	.	.
SOLO	71483	g17p5	2017-04-05	alive	.	.
SOLO	71483	g17p6	2017-04-05	alive	.	.
SOLO	71483	g17p7	2017-04-05	alive	.	.
SOLO	71483	g17p8	2017-04-05	alive	.	.
SOLO	71483	g17p9	2017-04-05	alive	.	.
SOLO	62978	g18p1	2017-04-09	cannibalism	1	no
SOLO	62978	g18p2	2017-04-09	cannibalism	1	no
SOLO	62978	g18p3	2017-04-09	found_dead	2	.
SOLO	62978	g18p4	2017-04-09	found_dead	2	.
SOLO	62978	g18p5	2017-04-09	found_dead	1	.
SOLO	62978	g18p6	2017-04-09	found_dead	1	.
SOLO	62978	g18p7	2017-04-09	alive	.	.
SOLO	62978	g18p8	2017-04-09	alive	.	.
SOLO	62978	g18p9	2017-04-09	alive	.	.
SOLO	72492	g19p1	2017-04-04	found_dead	0	.
SOLO	72492	g19p10	2017-04-04	found_dead	0	.
SOLO	72492	g19p2	2017-04-04	found_dead	0	.
SOLO	72492	g19p3	2017-04-04	found_dead	1	.
SOLO	72492	g19p4	2017-04-04	found_dead	1	.
SOLO	72492	g19p5	2017-04-04	found_dead	1	.
SOLO	72492	g19p6	2017-04-04	found_dead	1	.
SOLO	72492	g19p7	2017-04-04	found_dead	2	.
SOLO	72492	g19p8	2017-04-04	found_dead	2	.
SOLO	72492	g19p9	2017-04-04	found_dead	3	.
SOLO	72756	g22p1	2017-04-09	cannibalism	2	invisible
SOLO	72756	g22p2	2017-04-09	found_dead	1	.
SOLO	72756	g22p3	2017-04-09	found_dead	1	.
SOLO	72756	g22p4	2017-04-09	found_dead	2	.
SOLO	72756	g22p5	2017-04-09	alive	.	.
SOLO	72756	g22p6	2017-04-09	alive	.	.
SOLO	72756	g22p7	2017-04-09	alive	.	.
SOLO	72756	g22p8	2017-04-09	alive	.	.
SOLO	70422	g23p1	2017-04-11	found_dead	1	.
SOLO	70422	g23p2	2017-04-11	found_dead	3	.
SOLO	70422	g23p3	2017-04-11	alive	.	.
SOLO	70422	g23p4	2017-04-11	alive	.	.
SOLO	70422	g23p5	2017-04-11	alive	.	.
SOLO	70422	g23p6	2017-04-11	alive	.	.
SOLO	70422	g23p7	2017-04-11	alive	.	.
SOLO	70422	g23p8	2017-04-11	alive	.	.
SOLO	70422	g23p9	2017-04-11	alive	.	.
SOLO	69342	g25p1	2017-04-12	cannibalism	2	no
SOLO	69342	g25p10	2017-04-12	alive	.	.
SOLO	69342	g25p11	2017-04-12	alive	.	.
SOLO	69342	g25p2	2017-04-12	found_dead	2	.
SOLO	69342	g25p3	2017-04-12	found_dead	2	.
SOLO	69342	g25p4	2017-04-12	alive	.	.
SOLO	69342	g25p5	2017-04-12	alive	.	.
SOLO	69342	g25p6	2017-04-12	alive	.	.
SOLO	69342	g25p7	2017-04-12	alive	.	.
SOLO	69342	g25p8	2017-04-12	alive	.	.
SOLO	69342	g25p9	2017-04-12	alive	.	.
SOLO	71483	g26p1	2017-04-12	cannibalism	0	no
SOLO	71483	g26p10	2017-04-12	alive	.	.
SOLO	71483	g26p2	2017-04-12	found_dead	1	.
SOLO	71483	g26p3	2017-04-12	alive	.	.
SOLO	71483	g26p4	2017-04-12	alive	.	.
SOLO	71483	g26p5	2017-04-12	alive	.	.
SOLO	71483	g26p6	2017-04-12	alive	.	.
SOLO	71483	g26p7	2017-04-12	alive	.	.
SOLO	71483	g26p8	2017-04-12	alive	.	.
SOLO	71483	g26p9	2017-04-12	alive	.	.
SOLO	71484	g28p1	2017-04-16	found_dead	0	.
SOLO	71484	g28p2	2017-04-16	found_dead	1	.
SOLO	71484	g28p3	2017-04-16	alive	.	.
SOLO	71484	g28p4	2017-04-16	alive	.	.
SOLO	71484	g28p5	2017-04-16	alive	.	.
SOLO	71484	g28p6	2017-04-16	alive	.	.
SOLO	71484	g28p7	2017-04-16	alive	.	.
SOLO	71484	g28p8	2017-04-16	alive	.	.
SOLO	71484	g28p9	2017-04-16	alive	.	.
SOLO	69343	g31p1	2017-04-17	found_dead	0	.
SOLO	69343	g31p2	2017-04-17	found_dead	0	.
SOLO	69343	g31p3	2017-04-17	found_dead	1	.
SOLO	69343	g31p4	2017-04-17	alive	.	.
SOLO	69343	g31p5	2017-04-17	alive	.	.
SOLO	69343	g31p6	2017-04-17	alive	.	.
SOLO	69343	g31p7	2017-04-17	alive	.	.
SOLO	71018	g33p1	2017-04-19	cannibalism	1	no
SOLO	71018	g33p2	2017-04-19	found_dead	4	.
SOLO	71018	g33p3	2017-04-19	found_dead	0	.
SOLO	71018	g33p4	2017-04-19	found_dead	1	.
SOLO	71018	g33p5	2017-04-19	alive	.	.
SOLO	71018	g33p6	2017-04-19	alive	.	.
SOLO	71018	g33p7	2017-04-19	alive	.	.
SOLO	71018	g33p8	2017-04-19	alive	.	.
SOLO	71018	g33p9	2017-04-19	alive	.	.
SOLO	66460	g35p1	2017-04-19	cannibalism	0	no
SOLO	66460	g35p2	2017-04-19	found_dead	0	.
SOLO	66460	g35p3	2017-04-19	found_dead	0	.
SOLO	66460	g35p4	2017-04-19	found_dead	0	.
SOLO	66460	g35p5	2017-04-19	found_dead	0	.
SOLO	66461	g40p1	2017-04-23	alive	.	.
SOLO	66461	g40p2	2017-04-23	alive	.	.
SOLO	66461	g40p3	2017-04-23	alive	.	.
SOLO	66461	g40p4	2017-04-23	alive	.	.
SOLO	66461	g40p5	2017-04-23	alive	.	.
SOLO	72758	g41p1	2017-04-24	found_dead	1	.
SOLO	72758	g41p10	2017-04-24	alive	.	.
SOLO	72758	g41p2	2017-04-24	alive	.	.
SOLO	72758	g41p3	2017-04-24	alive	.	.
SOLO	72758	g41p4	2017-04-24	alive	.	.
SOLO	72758	g41p5	2017-04-24	alive	.	.
SOLO	72758	g41p6	2017-04-24	alive	.	.
SOLO	72758	g41p7	2017-04-24	alive	.	.
SOLO	72758	g41p8	2017-04-24	alive	.	.
SOLO	72758	g41p9	2017-04-24	alive	.	.
SOLO	64807	g42p1	2017-04-29	cannibalism	0	no
SOLO	64807	g42p10	2017-04-29	found_dead	0	.
SOLO	64807	g42p11	2017-04-29	alive	.	.
SOLO	64807	g42p12	2017-04-29	alive	.	.
SOLO	64807	g42p2	2017-04-29	cannibalism	1	no
SOLO	64807	g42p3	2017-04-29	cannibalism	1	no
SOLO	64807	g42p4	2017-04-29	cannibalism	1	no
SOLO	64807	g42p5	2017-04-29	cannibalism	1	no
SOLO	64807	g42p6	2017-04-29	found_dead	1	.
SOLO	64807	g42p7	2017-04-29	found_dead	1	.
SOLO	64807	g42p8	2017-04-29	found_dead	1	.
SOLO	64807	g42p9	2017-04-29	found_dead	1	.
SOLO	72758	g43p1	2017-04-27	cannibalism	1	no
SOLO	72758	g43p10	2017-04-27	alive	.	.
SOLO	72758	g43p11	2017-04-27	alive	.	.
SOLO	72758	g43p12	2017-04-27	alive	.	.
SOLO	72758	g43p2	2017-04-27	found_dead	1	.
SOLO	72758	g43p3	2017-04-27	found_dead	2	.
SOLO	72758	g43p4	2017-04-27	alive	.	.
SOLO	72758	g43p5	2017-04-27	alive	.	.
SOLO	72758	g43p6	2017-04-27	alive	.	.
SOLO	72758	g43p7	2017-04-27	alive	.	.
SOLO	72758	g43p8	2017-04-27	alive	.	.
SOLO	72758	g43p9	2017-04-27	alive	.	.
SOLO	72315	g45p1	2017-04-27	cannibalism	0	invisible
SOLO	72315	g45p10	2017-04-27	alive	.	.
SOLO	72315	g45p11	2017-04-27	alive	.	.
SOLO	72315	g45p2	2017-04-27	cannibalism	2	no
SOLO	72315	g45p3	2017-04-27	found_dead	3	.
SOLO	72315	g45p4	2017-04-27	alive	.	.
SOLO	72315	g45p5	2017-04-27	alive	.	.
SOLO	72315	g45p6	2017-04-27	alive	.	.
SOLO	72315	g45p7	2017-04-27	alive	.	.
SOLO	72315	g45p8	2017-04-27	alive	.	.
SOLO	72315	g45p9	2017-04-27	alive	.	.
SOLO	62978	g47p1	2017-05-02	cannibalism	1	invisible
SOLO	62978	g47p2	2017-05-02	found_dead	0	.
SOLO	62978	g47p3	2017-05-02	alive	.	.
SOLO	62978	g47p4	2017-05-02	alive	.	.
SOLO	62978	g47p5	2017-05-02	alive	.	.
SOLO	62978	g47p6	2017-05-02	alive	.	.
SOLO	64807	g48p1	2017-05-03	found_dead	0	.
SOLO	64807	g48p2	2017-05-03	found_dead	0	.
SOLO	64807	g48p3	2017-05-03	found_dead	1	.
SOLO	64807	g48p4	2017-05-03	found_dead	1	.
SOLO	64807	g48p5	2017-05-03	found_dead	1	.
SOLO	64807	g48p6	2017-05-03	found_dead	1	.
SOLO	64807	g48p7	2017-05-03	found_dead	2	.
SOLO	64807	g48p8	2017-05-03	found_dead	2	.
SOLO	64807	g48p9	2017-05-03	found_dead	2	.
SOLO	64805	g50p1	2017-05-09	cannibalism	1	no
SOLO	64805	g50p2	2017-05-09	found_dead	0	.
SOLO	64805	g50p3	2017-05-09	found_dead	0	.
SOLO	64805	g50p4	2017-05-09	found_dead	0	.
SOLO	69026	g51p1	2017-05-04	alive	.	.
SOLO	69026	g51p10	2017-05-04	alive	.	.
SOLO	69026	g51p2	2017-05-04	alive	.	.
SOLO	69026	g51p3	2017-05-04	alive	.	.
SOLO	69026	g51p4	2017-05-04	alive	.	.
SOLO	69026	g51p5	2017-05-04	alive	.	.
SOLO	69026	g51p6	2017-05-04	alive	.	.
SOLO	69026	g51p7	2017-05-04	alive	.	.
SOLO	69026	g51p8	2017-05-04	alive	.	.
SOLO	69026	g51p9	2017-05-04	alive	.	.
SOLO	71020	g53p1	2017-05-03	found_dead	0	.
SOLO	71020	g53p2	2017-05-03	found_dead	0	.
SOLO	71020	g53p3	2017-05-03	found_dead	1	.
SOLO	71020	g53p4	2017-05-03	found_dead	1	.
SOLO	71020	g53p5	2017-05-03	alive	.	.
SOLO	71020	g53p6	2017-05-03	alive	.	.
SOLO	71020	g53p7	2017-05-03	alive	.	.
SOLO	71020	g53p8	2017-05-03	alive	.	.
SOLO	69026	g56p1	2017-05-08	found_dead	1	.
SOLO	69026	g56p2	2017-05-08	alive	.	.
SOLO	69026	g56p3	2017-05-08	alive	.	.
SOLO	69026	g56p4	2017-05-08	alive	.	.
SOLO	69026	g56p5	2017-05-08	alive	.	.
SOLO	69026	g56p6	2017-05-08	alive	.	.
SOLO	69026	g56p7	2017-05-08	alive	.	.
SOLO	69026	g56p8	2017-05-08	alive	.	.
SOLO	69026	g56p9	2017-05-08	alive	.	.
SOLO	71482	g58p1	2017-05-08	cannibalism	1	not_detected
SOLO	71482	g58p2	2017-05-08	found_dead	0	.
SOLO	71482	g58p3	2017-05-08	alive	.	.
SOLO	71482	g58p4	2017-05-08	alive	.	.
SOLO	71482	g58p5	2017-05-08	alive	.	.
SOLO	71482	g58p6	2017-05-08	alive	.	.
SOLO	71482	g58p7	2017-05-08	alive	.	.
SOLO	71482	g58p8	2017-05-08	alive	.	.
SOLO	71482	g58p9	2017-05-08	alive	.	.
SOLO	71485	g60p1	2017-05-11	found_dead	1	.
SOLO	71485	g60p10	2017-05-11	alive	.	.
SOLO	71485	g60p11	2017-05-11	alive	.	.
SOLO	71485	g60p2	2017-05-11	found_dead	1	.
SOLO	71485	g60p3	2017-05-11	found_dead	1	.
SOLO	71485	g60p4	2017-05-11	found_dead	1	.
SOLO	71485	g60p5	2017-05-11	alive	.	.
SOLO	71485	g60p6	2017-05-11	alive	.	.
SOLO	71485	g60p7	2017-05-11	alive	.	.
SOLO	71485	g60p8	2017-05-11	alive	.	.
SOLO	71485	g60p9	2017-05-11	alive	.	.
SOLO	69773	g62p1	2017-05-10	found_dead	0	.
SOLO	69773	g62p10	2017-05-10	alive	.	.
SOLO	69773	g62p11	2017-05-10	alive	.	.
SOLO	69773	g62p2	2017-05-10	found_dead	0	.
SOLO	69773	g62p3	2017-05-10	found_dead	0	.
SOLO	69773	g62p4	2017-05-10	alive	.	.
SOLO	69773	g62p5	2017-05-10	alive	.	.
SOLO	69773	g62p6	2017-05-10	alive	.	.
SOLO	69773	g62p7	2017-05-10	alive	.	.
SOLO	69773	g62p8	2017-05-10	alive	.	.
SOLO	69773	g62p9	2017-05-10	alive	.	.
SOLO	74000	g63p1	2017-05-11	alive	.	.
SOLO	74000	g63p2	2017-05-11	alive	.	.
SOLO	74000	g63p3	2017-05-11	alive	.	.
SOLO	74000	g63p4	2017-05-11	alive	.	.
SOLO	74000	g63p5	2017-05-11	alive	.	.
SOLO	74000	g63p6	2017-05-11	alive	.	.
SOLO	74000	g63p7	2017-05-11	alive	.	.
SOLO	74000	g63p8	2017-05-11	alive	.	.
SOLO	74000	g63p9	2017-05-11	alive	.	.
SOLO	71019	g64p1	2017-05-12	found_dead	1	.
SOLO	71019	g64p10	2017-05-12	alive	.	.
SOLO	71019	g64p2	2017-05-12	alive	.	.
SOLO	71019	g64p3	2017-05-12	alive	.	.
SOLO	71019	g64p4	2017-05-12	alive	.	.
SOLO	71019	g64p5	2017-05-12	alive	.	.
SOLO	71019	g64p6	2017-05-12	alive	.	.
SOLO	71019	g64p7	2017-05-12	alive	.	.
SOLO	71019	g64p8	2017-05-12	alive	.	.
SOLO	71019	g64p9	2017-05-12	alive	.	.
SOLO	72315	g65p1	2017-05-18	cannibalism	0	no
SOLO	72315	g65p10	2017-05-18	alive	.	.
SOLO	72315	g65p2	2017-05-18	alive	.	.
SOLO	72315	g65p3	2017-05-18	alive	.	.
SOLO	72315	g65p4	2017-05-18	alive	.	.
SOLO	72315	g65p5	2017-05-18	alive	.	.
SOLO	72315	g65p6	2017-05-18	alive	.	.
SOLO	72315	g65p7	2017-05-18	alive	.	.
SOLO	72315	g65p8	2017-05-18	alive	.	.
SOLO	72315	g65p9	2017-05-18	alive	.	.
SOLO	74264	g66p1	2017-05-13	cannibalism	0	no
SOLO	74264	g66p2	2017-05-13	found_dead	0	.
SOLO	74264	g66p3	2017-05-13	found_dead	0	.
SOLO	72493	g67p1	2017-05-21	alive	.	.
SOLO	72493	g67p10	2017-05-21	alive	.	.
SOLO	72493	g67p11	2017-05-21	alive	.	.
SOLO	72493	g67p2	2017-05-21	alive	.	.
SOLO	72493	g67p3	2017-05-21	alive	.	.
SOLO	72493	g67p4	2017-05-21	alive	.	.
SOLO	72493	g67p5	2017-05-21	alive	.	.
SOLO	72493	g67p6	2017-05-21	alive	.	.
SOLO	72493	g67p7	2017-05-21	alive	.	.
SOLO	72493	g67p8	2017-05-21	alive	.	.
SOLO	72493	g67p9	2017-05-21	alive	.	.
SOLO	74055	g68p1	2017-05-14	cannibalism	1	no
SOLO	74055	g68p10	2017-05-14	alive	.	.
SOLO	74055	g68p2	2017-05-14	cannibalism	2	invisible
SOLO	74055	g68p3	2017-05-14	cannibalism	3	no
SOLO	74055	g68p4	2017-05-14	cannibalism	4	no
SOLO	74055	g68p5	2017-05-14	found_dead	0	.
SOLO	74055	g68p6	2017-05-14	found_dead	1	.
SOLO	74055	g68p7	2017-05-14	found_dead	1	.
SOLO	74055	g68p8	2017-05-14	found_dead	1	.
SOLO	74055	g68p9	2017-05-14	alive	.	.
SOLO	74418	g70p1	2017-05-15	found_dead	1	.
SOLO	74418	g70p2	2017-05-15	alive	.	.
SOLO	74418	g70p3	2017-05-15	alive	.	.
SOLO	74418	g70p4	2017-05-15	alive	.	.
SOLO	74418	g70p5	2017-05-15	alive	.	.
SOLO	74418	g70p6	2017-05-15	alive	.	.
SOLO	74418	g70p7	2017-05-15	alive	.	.
SOLO	74418	g70p8	2017-05-15	alive	.	.
SOLO	74418	g70p9	2017-05-15	alive	.	.
SOLO	71480	g71p1	2017-05-18	cannibalism	0	no
SOLO	71480	g71p2	2017-05-18	found_dead	0	.
SOLO	71480	g71p3	2017-05-18	alive	.	.
SOLO	71480	g71p4	2017-05-18	alive	.	.
SOLO	71480	g71p5	2017-05-18	alive	.	.
SOLO	71480	g71p6	2017-05-18	alive	.	.
SOLO	71480	g71p7	2017-05-18	alive	.	.
SOLO	66523	g75p1	2017-05-22	cannibalism	0	not_detected
SOLO	66523	g75p2	2017-05-22	cannibalism	0	not_detected
SOLO	66523	g75p3	2017-05-22	alive	.	.
SOLO	66523	g75p4	2017-05-22	alive	.	.
SOLO	66523	g75p5	2017-05-22	alive	.	.
SOLO	66523	g75p6	2017-05-22	alive	.	.
SOLO	66523	g75p7	2017-05-22	alive	.	.
SOLO	66523	g75p8	2017-05-22	alive	.	.
SOLO	69773	g79p10	2017-05-24	alive	.	.
SOLO	69773	g79p11	2017-05-24	alive	.	.
SOLO	69773	g79p12	2017-05-24	alive	.	.
SOLO	69773	g79p13	2017-05-24	alive	.	.
SOLO	69773	g79p5	2017-05-24	alive	.	.
SOLO	69773	g79p6	2017-05-24	alive	.	.
SOLO	69773	g79p7	2017-05-24	alive	.	.
SOLO	69773	g79p8	2017-05-24	alive	.	.
SOLO	69773	g79p9	2017-05-24	alive	.	.
SOLO	69341	g81p1	2017-05-26	found_dead	1	.
SOLO	69341	g81p2	2017-05-26	found_dead	1	.
SOLO	69341	g81p3	2017-05-26	found_dead	1	.
SOLO	69341	g81p4	2017-05-26	found_dead	2	.
SOLO	69341	g81p5	2017-05-26	found_dead	2	.
SOLO	71485	g82p1	2017-05-26	found_dead	0	.
SOLO	71485	g82p2	2017-05-26	alive	.	.
SOLO	71485	g82p3	2017-05-26	alive	.	.
SOLO	71485	g82p4	2017-05-26	alive	.	.
SOLO	71485	g82p5	2017-05-26	alive	.	.
SOLO	71485	g82p6	2017-05-26	alive	.	.
SOLO	71485	g82p7	2017-05-26	alive	.	.
SOLO	71485	g82p8	2017-05-26	alive	.	.
SOLO	71485	g82p9	2017-05-26	alive	.	.
SOLO	69776	g84p1	2017-05-28	found_dead	0	.
SOLO	69776	g84p2	2017-05-28	alive	.	.
SOLO	69776	g84p3	2017-05-28	alive	.	.
SOLO	69776	g84p4	2017-05-28	alive	.	.
SOLO	69776	g84p5	2017-05-28	alive	.	.
SOLO	69776	g84p6	2017-05-28	alive	.	.
SOLO	75628	g86p1	2017-05-30	alive	.	.
SOLO	75628	g86p2	2017-05-30	alive	.	.
SOLO	75628	g86p3	2017-05-30	alive	.	.
SOLO	75628	g86p4	2017-05-30	alive	.	.
SOLO	75628	g86p5	2017-05-30	alive	.	.
SOLO	75628	g86p6	2017-05-30	alive	.	.
SOLO	75628	g86p7	2017-05-30	alive	.	.
SOLO	73157	g92p1	2017-06-01	found_dead	0	.
SOLO	73157	g92p10	2017-06-01	alive	.	.
SOLO	73157	g92p11	2017-06-01	alive	.	.
SOLO	73157	g92p2	2017-06-01	found_dead	0	.
SOLO	73157	g92p3	2017-06-01	found_dead	1	.
SOLO	73157	g92p4	2017-06-01	found_dead	1	.
SOLO	73157	g92p5	2017-06-01	alive	.	.
SOLO	73157	g92p6	2017-06-01	alive	.	.
SOLO	73157	g92p7	2017-06-01	alive	.	.
SOLO	73157	g92p8	2017-06-01	alive	.	.
SOLO	73157	g92p9	2017-06-01	alive	.	.
SOLO	74061	g94p1	2017-06-04	cannibalism	1	no
SOLO	74061	g94p10	2017-06-04	found_dead	1	.
SOLO	74061	g94p11	2017-06-04	found_dead	1	.
SOLO	74061	g94p2	2017-06-04	cannibalism	2	no
SOLO	74061	g94p3	2017-06-04	found_dead	1	.
SOLO	74061	g94p4	2017-06-04	found_dead	1	.
SOLO	74061	g94p5	2017-06-04	found_dead	1	.
SOLO	74061	g94p6	2017-06-04	found_dead	1	.
SOLO	74061	g94p7	2017-06-04	found_dead	1	.
SOLO	74061	g94p8	2017-06-04	found_dead	1	.
SOLO	74061	g94p9	2017-06-04	found_dead	1	.
SOLO	74055	g96p1	2017-06-04	found_dead	1	.
SOLO	74055	g96p2	2017-06-04	found_dead	1	.
SOLO	74055	g96p3	2017-06-04	alive	.	.
SOLO	74055	g96p4	2017-06-04	alive	.	.
SOLO	74055	g96p5	2017-06-04	alive	.	.
SOLO	74055	g96p6	2017-06-04	alive	.	.
SOLO	74055	g96p7	2017-06-04	alive	.	.
SOLO	74423	g101p1	2017-06-10	cannibalism	0	no
SOLO	74423	g101p2	2017-06-10	found_dead	0	.
SOLO	74423	g101p3	2017-06-10	found_dead	0	.
SOLO	74423	g101p4	2017-06-10	found_dead	1	.
SOLO	74423	g101p5	2017-06-10	alive	.	.
SOLO	74423	g101p6	2017-06-10	alive	.	.
SOLO	74423	g101p7	2017-06-10	alive	.	.
SOLO	74423	g101p8	2017-06-10	alive	.	.
SOLO	74423	g101p9	2017-06-10	alive	.	.
SOLO	74640	g103p1	culled	alive	.	.
SOLO	74640	g103p2	culled	alive	.	.
SOLO	74640	g103p3	culled	alive	.	.
SOLO	74640	g103p4	culled	alive	.	.
SOLO	74640	g103p5	culled	alive	.	.
SOLO	74640	g103p6	culled	alive	.	.
SOLO	74640	g103p7	culled	alive	.	.
SOLO	76564	g106p1	2017-06-10	found_dead	2	.
SOLO	76564	g106p2	2017-06-10	found_dead	2	.
SOLO	74417	g107p1	2017-06-12	found_dead	1	.
SOLO	74417	g107p2	2017-06-12	found_dead	2	.
SOLO	74417	g107p3	2017-06-12	found_dead	2	.
SOLO	74417	g107p4	2017-06-12	found_dead	2	.
SOLO	74417	g107p5	2017-06-12	found_dead	2	.
SOLO	74417	g107p6	2017-06-12	found_dead	2	.
SOLO	74417	g107p7	2017-06-12	found_dead	2	.
SOLO	74417	g107p8	2017-06-12	found_dead	2	.
SOLO	75233	g110p1	2017-06-14	cannibalism	1	no
SOLO	75233	g110p10	2017-06-14	alive	.	.
SOLO	75233	g110p11	2017-06-14	alive	.	.
SOLO	75233	g110p12	2017-06-14	alive	.	.
SOLO	75233	g110p2	2017-06-13	found_dead	1	.
SOLO	75233	g110p3	2017-06-14	alive	.	.
SOLO	75233	g110p4	2017-06-14	alive	.	.
SOLO	75233	g110p5	2017-06-14	alive	.	.
SOLO	75233	g110p6	2017-06-14	alive	.	.
SOLO	75233	g110p7	2017-06-14	alive	.	.
SOLO	75233	g110p8	2017-06-14	alive	.	.
SOLO	75233	g110p9	2017-06-14	alive	.	.
TRIO-NO_OVERLAP	69342	g1p1	2017-03-24	cannibalism	1	no
TRIO-NO_OVERLAP	69342	g1p10	2017-03-24	found_dead	1	.
TRIO-NO_OVERLAP	69342	g1p11	2017-03-24	found_dead	3	.
TRIO-NO_OVERLAP	69342	g1p12	2017-03-24	found_dead	2	.
TRIO-NO_OVERLAP	69342	g1p13	2017-03-24	found_dead	2	.
TRIO-NO_OVERLAP	69342	g1p2	2017-03-24	found_dead	2	.
TRIO-NO_OVERLAP	69342	g1p3	2017-03-24	found_dead	2	.
TRIO-NO_OVERLAP	69342	g1p4	2017-03-24	found_dead	2	.
TRIO-NO_OVERLAP	69342	g1p5	2017-03-24	found_dead	2	.
TRIO-NO_OVERLAP	69342	g1p6	2017-03-24	found_dead	2	.
TRIO-NO_OVERLAP	69342	g1p7	2017-03-24	found_dead	3	.
TRIO-NO_OVERLAP	69342	g1p8	2017-03-24	found_dead	3	.
TRIO-NO_OVERLAP	69342	g1p9	2017-03-24	found_dead	3	.
TRIO-NO_OVERLAP	67039	g5p1	2017-03-29	cannibalism	1	no
TRIO-NO_OVERLAP	67039	g5p2	2017-03-29	cannibalism	0	yes
TRIO-NO_OVERLAP	67039	g5p3	2017-03-29	alive	.	.
TRIO-NO_OVERLAP	67039	g5p4	2017-03-29	alive	.	.
TRIO-NO_OVERLAP	67039	g5p5	2017-03-29	alive	.	.
TRIO-NO_OVERLAP	67039	g5p6	2017-03-29	alive	.	.
TRIO-NO_OVERLAP	67039	g5p7	2017-03-29	alive	.	.
TRIO-NO_OVERLAP	67039	g5p8	2017-03-29	alive	.	.
TRIO-NO_OVERLAP	67039	g5p9	2017-03-29	alive	.	.
TRIO-NO_OVERLAP	71023	g6p1	2017-04-03	found_dead	0	.
TRIO-NO_OVERLAP	71023	g6p10	2017-04-03	alive	.	.
TRIO-NO_OVERLAP	71023	g6p2	2017-04-03	alive	.	.
TRIO-NO_OVERLAP	71023	g6p3	2017-04-03	alive	.	.
TRIO-NO_OVERLAP	71023	g6p4	2017-04-03	alive	.	.
TRIO-NO_OVERLAP	71023	g6p5	2017-04-03	alive	.	.
TRIO-NO_OVERLAP	71023	g6p6	2017-04-03	alive	.	.
TRIO-NO_OVERLAP	71023	g6p7	2017-04-03	alive	.	.
TRIO-NO_OVERLAP	71023	g6p8	2017-04-03	alive	.	.
TRIO-NO_OVERLAP	71023	g6p9	2017-04-03	alive	.	.
TRIO-NO_OVERLAP	69774	g8p1	2017-03-26	cannibalism	1	invisible
TRIO-NO_OVERLAP	69774	g8p2	2017-03-26	cannibalism	1	no
TRIO-NO_OVERLAP	69774	g8p3	2017-03-26	cannibalism	1	no
TRIO-NO_OVERLAP	69774	g8p4	2017-03-26	found_dead	2	.
TRIO-NO_OVERLAP	69774	g8p5	2017-03-26	alive	.	.
TRIO-NO_OVERLAP	69774	g8p6	2017-03-26	alive	.	.
TRIO-NO_OVERLAP	69774	g8p7	2017-03-26	alive	.	.
TRIO-NO_OVERLAP	66521	g9p1	2017-03-28	cannibalism	1	invisible
TRIO-NO_OVERLAP	66521	g9p10	2017-03-28	alive	.	.
TRIO-NO_OVERLAP	66521	g9p2	2017-03-28	alive	.	.
TRIO-NO_OVERLAP	66521	g9p3	2017-03-28	alive	.	.
TRIO-NO_OVERLAP	66521	g9p4	2017-03-28	alive	.	.
TRIO-NO_OVERLAP	66521	g9p5	2017-03-28	alive	.	.
TRIO-NO_OVERLAP	66521	g9p6	2017-03-28	alive	.	.
TRIO-NO_OVERLAP	66521	g9p7	2017-03-28	alive	.	.
TRIO-NO_OVERLAP	66521	g9p8	2017-03-28	alive	.	.
TRIO-NO_OVERLAP	66521	g9p9	2017-03-28	alive	.	.
TRIO-NO_OVERLAP	64807	g20p1	2017-04-07	cannibalism	0	probable
TRIO-NO_OVERLAP	64807	g20p2	2017-04-07	cannibalism	0	probable
TRIO-NO_OVERLAP	64807	g20p3	2017-04-06	found_dead	2	.
TRIO-NO_OVERLAP	64807	g20p4	2017-04-06	found_dead	2	.
TRIO-NO_OVERLAP	64807	g20p5	2017-04-06	found_dead	1	.
TRIO-NO_OVERLAP	64807	g20p6	2017-04-06	found_dead	1	.
TRIO-NO_OVERLAP	64807	g20p7	2017-04-06	found_dead	2	.
TRIO-NO_OVERLAP	64807	g20p8	2017-04-06	found_dead	2	.
TRIO-NO_OVERLAP	66461	g21p1	2017-04-07	cannibalism	0	invisible
TRIO-NO_OVERLAP	66461	g21p2	2017-04-07	cannibalism	1	no
TRIO-NO_OVERLAP	66461	g21p3	2017-04-07	cannibalism	1	no
TRIO-NO_OVERLAP	66461	g21p4	2017-04-07	cannibalism	2	no
TRIO-NO_OVERLAP	66461	g21p5	2017-04-07	cannibalism	2	no
TRIO-NO_OVERLAP	66461	g21p6	2017-04-07	found_dead	0	.
TRIO-NO_OVERLAP	66461	g21p7	2017-04-07	found_dead	0	.
TRIO-NO_OVERLAP	69025	g24p1	2017-04-14	found_dead	0	.
TRIO-NO_OVERLAP	69025	g24p10	2017-04-14	alive	.	.
TRIO-NO_OVERLAP	69025	g24p2	2017-04-14	found_dead	1	.
TRIO-NO_OVERLAP	69025	g24p3	2017-04-14	alive	.	.
TRIO-NO_OVERLAP	69025	g24p4	2017-04-14	alive	.	.
TRIO-NO_OVERLAP	69025	g24p5	2017-04-14	alive	.	.
TRIO-NO_OVERLAP	69025	g24p6	2017-04-14	alive	.	.
TRIO-NO_OVERLAP	69025	g24p7	2017-04-14	alive	.	.
TRIO-NO_OVERLAP	69025	g24p8	2017-04-14	alive	.	.
TRIO-NO_OVERLAP	69025	g24p9	2017-04-14	alive	.	.
TRIO-NO_OVERLAP	71482	g27p1	2017-04-14	cannibalism	1	invisible
TRIO-NO_OVERLAP	71482	g27p2	2017-04-14	alive	.	.
TRIO-NO_OVERLAP	71482	g27p3	2017-04-14	alive	.	.
TRIO-NO_OVERLAP	71482	g27p4	2017-04-14	alive	.	.
TRIO-NO_OVERLAP	71482	g27p5	2017-04-14	alive	.	.
TRIO-NO_OVERLAP	71482	g27p6	2017-04-14	alive	.	.
TRIO-NO_OVERLAP	71482	g27p7	2017-04-14	alive	.	.
TRIO-NO_OVERLAP	71482	g27p8	2017-04-14	alive	.	.
TRIO-NO_OVERLAP	71482	g27p9	2017-04-14	alive	.	.
TRIO-NO_OVERLAP	69776	g29p1	2017-04-13	cannibalism	0	no
TRIO-NO_OVERLAP	69776	g29p2	2017-04-13	found_dead	0	.
TRIO-NO_OVERLAP	69776	g29p3	2017-04-13	found_dead	1	.
TRIO-NO_OVERLAP	69776	g29p4	2017-04-13	found_dead	1	.
TRIO-NO_OVERLAP	69776	g29p5	2017-04-13	found_dead	1	.
TRIO-NO_OVERLAP	69776	g29p6	2017-04-13	found_dead	1	.
TRIO-NO_OVERLAP	69776	g29p7	2017-04-13	found_dead	1	.
TRIO-NO_OVERLAP	69776	g29p8	2017-04-13	found_dead	1	.
TRIO-NO_OVERLAP	71481	g30p1	2017-04-17	cannibalism	1	no
TRIO-NO_OVERLAP	71481	g30p10	2017-04-17	alive	.	.
TRIO-NO_OVERLAP	71481	g30p2	2017-04-17	alive	.	.
TRIO-NO_OVERLAP	71481	g30p3	2017-04-17	alive	.	.
TRIO-NO_OVERLAP	71481	g30p4	2017-04-17	alive	.	.
TRIO-NO_OVERLAP	71481	g30p5	2017-04-17	alive	.	.
TRIO-NO_OVERLAP	71481	g30p6	2017-04-17	alive	.	.
TRIO-NO_OVERLAP	71481	g30p7	2017-04-17	alive	.	.
TRIO-NO_OVERLAP	71481	g30p8	2017-04-17	alive	.	.
TRIO-NO_OVERLAP	71481	g30p9	2017-04-17	alive	.	.
TRIO-NO_OVERLAP	66521	g36p1	2017-04-20	cannibalism	2	no
TRIO-NO_OVERLAP	66521	g36p2	2017-04-20	found_dead	0	.
TRIO-NO_OVERLAP	66521	g36p3	2017-04-20	alive	.	.
TRIO-NO_OVERLAP	66521	g36p4	2017-04-20	alive	.	.
TRIO-NO_OVERLAP	66521	g36p5	2017-04-20	alive	.	.
TRIO-NO_OVERLAP	66521	g36p6	2017-04-20	alive	.	.
TRIO-NO_OVERLAP	66521	g36p7	2017-04-20	alive	.	.
TRIO-NO_OVERLAP	66522	g38p1	2017-04-23	cannibalism	0	yes
TRIO-NO_OVERLAP	66522	g38p2	2017-04-23	found_dead	1	.
TRIO-NO_OVERLAP	66522	g38p3	2017-04-23	found_dead	1	.
TRIO-NO_OVERLAP	66522	g38p4	2017-04-23	found_dead	1	.
TRIO-NO_OVERLAP	66522	g38p5	2017-04-23	found_dead	1	.
TRIO-NO_OVERLAP	66522	g38p6	2017-04-23	found_dead	1	.
TRIO-NO_OVERLAP	66522	g38p7	2017-04-23	found_dead	1	.
TRIO-NO_OVERLAP	66522	g38p8	2017-04-23	found_dead	1	.
TRIO-NO_OVERLAP	70421	g39p1	2017-04-24	cannibalism	1	no
TRIO-NO_OVERLAP	70421	g39p2	2017-04-24	cannibalism	1	invisible
TRIO-NO_OVERLAP	70421	g39p3	2017-04-24	cannibalism	0	yes
TRIO-NO_OVERLAP	70421	g39p4	2017-04-24	alive	.	.
TRIO-NO_OVERLAP	70421	g39p5	2017-04-24	alive	.	.
TRIO-NO_OVERLAP	70421	g39p6	2017-04-24	alive	.	.
TRIO-NO_OVERLAP	70421	g39p7	2017-04-24	alive	.	.
TRIO-NO_OVERLAP	70421	g39p8	2017-04-24	alive	.	.
TRIO-NO_OVERLAP	70421	g39p9	2017-04-24	alive	.	.
TRIO-NO_OVERLAP	72316	g49p1	2017-04-30	found_dead	0	.
TRIO-NO_OVERLAP	72316	g49p10	2017-04-30	alive	.	.
TRIO-NO_OVERLAP	72316	g49p11	2017-04-30	alive	.	.
TRIO-NO_OVERLAP	72316	g49p12	2017-04-30	alive	.	.
TRIO-NO_OVERLAP	72316	g49p2	2017-04-30	found_dead	0	.
TRIO-NO_OVERLAP	72316	g49p3	2017-04-30	found_dead	0	.
TRIO-NO_OVERLAP	72316	g49p4	2017-04-30	alive	.	.
TRIO-NO_OVERLAP	72316	g49p5	2017-04-30	alive	.	.
TRIO-NO_OVERLAP	72316	g49p6	2017-04-30	alive	.	.
TRIO-NO_OVERLAP	72316	g49p7	2017-04-30	alive	.	.
TRIO-NO_OVERLAP	72316	g49p8	2017-04-30	alive	.	.
TRIO-NO_OVERLAP	72316	g49p9	2017-04-30	alive	.	.
TRIO-NO_OVERLAP	71885	g59p1	2017-05-08	found_dead	1	.
TRIO-NO_OVERLAP	71885	g59p2	2017-05-08	alive	.	.
TRIO-NO_OVERLAP	71885	g59p3	2017-05-08	alive	.	.
TRIO-NO_OVERLAP	71885	g59p4	2017-05-08	alive	.	.
TRIO-NO_OVERLAP	71885	g59p5	2017-05-08	alive	.	.
TRIO-NO_OVERLAP	71885	g59p6	2017-05-08	alive	.	.
TRIO-NO_OVERLAP	71885	g59p7	2017-05-08	alive	.	.
TRIO-NO_OVERLAP	71885	g59p8	2017-05-08	alive	.	.
TRIO-NO_OVERLAP	75230	g69p1	2017-05-16	cannibalism	2	invisible
TRIO-NO_OVERLAP	75230	g69p10	2017-05-16	alive	.	.
TRIO-NO_OVERLAP	75230	g69p2	2017-05-16	alive	.	.
TRIO-NO_OVERLAP	75230	g69p3	2017-05-16	alive	.	.
TRIO-NO_OVERLAP	75230	g69p4	2017-05-16	alive	.	.
TRIO-NO_OVERLAP	75230	g69p5	2017-05-16	alive	.	.
TRIO-NO_OVERLAP	75230	g69p6	2017-05-16	alive	.	.
TRIO-NO_OVERLAP	75230	g69p7	2017-05-16	alive	.	.
TRIO-NO_OVERLAP	75230	g69p8	2017-05-16	alive	.	.
TRIO-NO_OVERLAP	75230	g69p9	2017-05-16	alive	.	.
TRIO-NO_OVERLAP	72757	g74p1	2017-05-20	cannibalism	1	no
TRIO-NO_OVERLAP	72757	g74p2	2017-05-20	alive	.	.
TRIO-NO_OVERLAP	72757	g74p3	2017-05-20	alive	.	.
TRIO-NO_OVERLAP	72757	g74p4	2017-05-20	alive	.	.
TRIO-NO_OVERLAP	72757	g74p5	2017-05-20	alive	.	.
TRIO-NO_OVERLAP	72757	g74p6	2017-05-20	alive	.	.
TRIO-NO_OVERLAP	72757	g74p7	2017-05-20	alive	.	.
TRIO-NO_OVERLAP	72757	g74p8	2017-05-20	alive	.	.
TRIO-NO_OVERLAP	72757	g74p9	2017-05-20	alive	.	.
TRIO-NO_OVERLAP	73874	g76p1	2017-05-23	cannibalism	0	probable
TRIO-NO_OVERLAP	73874	g76p10	2017-05-23	alive	.	.
TRIO-NO_OVERLAP	73874	g76p11	2017-05-23	alive	.	.
TRIO-NO_OVERLAP	73874	g76p12	2017-05-23	alive	.	.
TRIO-NO_OVERLAP	73874	g76p2	2017-05-23	found_dead	0	.
TRIO-NO_OVERLAP	73874	g76p3	2017-05-23	alive	.	.
TRIO-NO_OVERLAP	73874	g76p4	2017-05-23	alive	.	.
TRIO-NO_OVERLAP	73874	g76p5	2017-05-23	alive	.	.
TRIO-NO_OVERLAP	73874	g76p6	2017-05-23	alive	.	.
TRIO-NO_OVERLAP	73874	g76p7	2017-05-23	alive	.	.
TRIO-NO_OVERLAP	73874	g76p8	2017-05-23	alive	.	.
TRIO-NO_OVERLAP	73874	g76p9	2017-05-23	alive	.	.
TRIO-NO_OVERLAP	74003	g77p1	2017-05-23	alive	.	.
TRIO-NO_OVERLAP	74003	g77p10	2017-05-23	alive	.	.
TRIO-NO_OVERLAP	74003	g77p2	2017-05-23	alive	.	.
TRIO-NO_OVERLAP	74003	g77p3	2017-05-23	alive	.	.
TRIO-NO_OVERLAP	74003	g77p4	2017-05-23	alive	.	.
TRIO-NO_OVERLAP	74003	g77p5	2017-05-23	alive	.	.
TRIO-NO_OVERLAP	74003	g77p6	2017-05-23	alive	.	.
TRIO-NO_OVERLAP	74003	g77p7	2017-05-23	alive	.	.
TRIO-NO_OVERLAP	74003	g77p8	2017-05-23	alive	.	.
TRIO-NO_OVERLAP	74003	g77p9	2017-05-23	alive	.	.
TRIO-NO_OVERLAP	71484	g78p1	2017-05-25	found_dead	0	.
TRIO-NO_OVERLAP	71484	g78p2	2017-05-25	found_dead	0	.
TRIO-NO_OVERLAP	71484	g78p3	2017-05-25	found_dead	0	.
TRIO-NO_OVERLAP	71484	g78p4	2017-05-25	found_dead	0	.
TRIO-NO_OVERLAP	72756	g80p1	2017-05-23	cannibalism	1	no
TRIO-NO_OVERLAP	72756	g80p2	2017-05-23	cannibalism	1	no
TRIO-NO_OVERLAP	72756	g80p3	2017-05-23	cannibalism	1	no
TRIO-NO_OVERLAP	72756	g80p4	2017-05-23	cannibalism	1	no
TRIO-NO_OVERLAP	72756	g80p5	2017-05-23	cannibalism	3	invisible
TRIO-NO_OVERLAP	72756	g80p6	2017-05-23	found_dead	0	.
TRIO-NO_OVERLAP	72756	g80p7	2017-05-23	found_dead	1	.
TRIO-NO_OVERLAP	75633	g83p1	2017-05-27	alive	.	.
TRIO-NO_OVERLAP	75633	g83p2	2017-05-27	alive	.	.
TRIO-NO_OVERLAP	75633	g83p3	2017-05-27	alive	.	.
TRIO-NO_OVERLAP	75633	g83p4	2017-05-27	alive	.	.
TRIO-NO_OVERLAP	75633	g83p5	2017-05-27	alive	.	.
TRIO-NO_OVERLAP	75633	g83p6	2017-05-27	alive	.	.
TRIO-NO_OVERLAP	69343	g87p1	2017-05-31	cannibalism	0	probable
TRIO-NO_OVERLAP	69343	g87p2	2017-05-31	alive	.	.
TRIO-NO_OVERLAP	69343	g87p3	2017-05-31	alive	.	.
TRIO-NO_OVERLAP	69343	g87p4	2017-05-31	alive	.	.
TRIO-NO_OVERLAP	69343	g87p5	2017-05-31	alive	.	.
TRIO-NO_OVERLAP	69343	g87p6	2017-05-31	alive	.	.
TRIO-NO_OVERLAP	69343	g87p7	2017-05-31	alive	.	.
TRIO-NO_OVERLAP	69343	g87p8	2017-05-31	alive	.	.
TRIO-NO_OVERLAP	74639	g88p1	2017-05-31	alive	.	.
TRIO-NO_OVERLAP	74639	g88p2	2017-05-31	alive	.	.
TRIO-NO_OVERLAP	74639	g88p3	2017-05-31	alive	.	.
TRIO-NO_OVERLAP	74639	g88p4	2017-05-31	alive	.	.
TRIO-NO_OVERLAP	74639	g88p5	2017-05-31	alive	.	.
TRIO-NO_OVERLAP	74639	g88p6	2017-05-31	alive	.	.
TRIO-NO_OVERLAP	74639	g88p7	2017-05-31	alive	.	.
TRIO-NO_OVERLAP	74639	g88p8	2017-05-31	alive	.	.
TRIO-NO_OVERLAP	76528	g89p1	2017-05-31	alive	.	.
TRIO-NO_OVERLAP	76528	g89p2	2017-05-31	alive	.	.
TRIO-NO_OVERLAP	76528	g89p3	2017-05-31	alive	.	.
TRIO-NO_OVERLAP	76528	g89p4	2017-05-31	alive	.	.
TRIO-NO_OVERLAP	76528	g89p5	2017-05-31	alive	.	.
TRIO-NO_OVERLAP	76528	g89p6	2017-05-31	alive	.	.
TRIO-NO_OVERLAP	76528	g89p7	2017-05-31	alive	.	.
TRIO-NO_OVERLAP	76528	g89p8	2017-05-31	alive	.	.
TRIO-NO_OVERLAP	76528	g89p9	2017-05-31	alive	.	.
TRIO-NO_OVERLAP	75630	g90p1	2017-06-01	cannibalism	0	invisible
TRIO-NO_OVERLAP	75630	g90p2	2017-06-01	cannibalism	0	no
TRIO-NO_OVERLAP	75630	g90p3	2017-06-01	cannibalism	0	invisible
TRIO-NO_OVERLAP	75630	g90p4	2017-06-01	alive	.	.
TRIO-NO_OVERLAP	75630	g90p5	2017-06-01	alive	.	.
TRIO-NO_OVERLAP	75630	g90p6	2017-06-01	alive	.	.
TRIO-NO_OVERLAP	75630	g90p7	2017-06-01	alive	.	.
TRIO-NO_OVERLAP	75630	g90p8	2017-06-01	alive	.	.
TRIO-NO_OVERLAP	75630	g90p9	2017-06-01	alive	.	.
TRIO-NO_OVERLAP	71885	g91p1	2017-06-02	cannibalism	0	probable
TRIO-NO_OVERLAP	71885	g91p2	2017-06-02	cannibalism	2	no
TRIO-NO_OVERLAP	71885	g91p3	2017-06-02	found_dead	2	.
TRIO-NO_OVERLAP	71885	g91p4	2017-06-02	found_dead	1	.
TRIO-NO_OVERLAP	71885	g91p5	2017-06-02	alive	.	.
TRIO-NO_OVERLAP	71885	g91p6	2017-06-02	alive	.	.
TRIO-NO_OVERLAP	71885	g91p7	2017-06-02	alive	.	.
TRIO-NO_OVERLAP	71885	g91p8	2017-06-02	alive	.	.
TRIO-NO_OVERLAP	71885	g91p9	2017-06-02	alive	.	.
TRIO-NO_OVERLAP	72316	g93p1	2017-06-01	alive	.	.
TRIO-NO_OVERLAP	72316	g93p2	2017-06-01	alive	.	.
TRIO-NO_OVERLAP	72316	g93p3	2017-06-01	alive	.	.
TRIO-NO_OVERLAP	72316	g93p4	2017-06-01	alive	.	.
TRIO-NO_OVERLAP	72316	g93p5	2017-06-01	alive	.	.
TRIO-NO_OVERLAP	72316	g93p6	2017-06-01	alive	.	.
TRIO-NO_OVERLAP	72316	g93p7	2017-06-01	alive	.	.
TRIO-NO_OVERLAP	72316	g93p8	2017-06-01	alive	.	.
TRIO-NO_OVERLAP	71888	g97p1	2017-06-10	cannibalism	0	invisible
TRIO-NO_OVERLAP	71888	g97p10	2017-06-10	alive	.	.
TRIO-NO_OVERLAP	71888	g97p11	2017-06-10	alive	.	.
TRIO-NO_OVERLAP	71888	g97p2	2017-06-10	cannibalism	1	invisible
TRIO-NO_OVERLAP	71888	g97p3	2017-06-10	cannibalism	1	invisible
TRIO-NO_OVERLAP	71888	g97p4	2017-06-10	cannibalism	1	invisible
TRIO-NO_OVERLAP	71888	g97p5	2017-06-10	alive	.	.
TRIO-NO_OVERLAP	71888	g97p6	2017-06-10	alive	.	.
TRIO-NO_OVERLAP	71888	g97p7	2017-06-10	alive	.	.
TRIO-NO_OVERLAP	71888	g97p8	2017-06-10	alive	.	.
TRIO-NO_OVERLAP	71888	g97p9	2017-06-10	alive	.	.
TRIO-NO_OVERLAP	74048	g98p1	2017-06-06	cannibalism	0	no
TRIO-NO_OVERLAP	74048	g98p2	2017-06-06	cannibalism	3	no
TRIO-NO_OVERLAP	74048	g98p3	2017-06-06	cannibalism	0	probable
TRIO-NO_OVERLAP	74048	g98p4	2017-06-06	found_dead	3	.
TRIO-NO_OVERLAP	74048	g98p5	2017-06-06	found_dead	0	.
TRIO-NO_OVERLAP	74060	g100p1	2017-06-07	cannibalism	0	not_detected
TRIO-NO_OVERLAP	74060	g100p2	2017-06-07	cannibalism	1	invisible
TRIO-NO_OVERLAP	74060	g100p3	2017-06-07	alive	.	.
TRIO-NO_OVERLAP	74060	g100p4	2017-06-07	alive	.	.
TRIO-NO_OVERLAP	74060	g100p5	2017-06-07	alive	.	.
TRIO-NO_OVERLAP	74060	g100p6	2017-06-07	alive	.	.
TRIO-NO_OVERLAP	74060	g100p7	2017-06-07	alive	.	.
TRIO-NO_OVERLAP	74060	g100p8	2017-06-07	alive	.	.
TRIO-NO_OVERLAP	74060	g100p9	2017-06-07	alive	.	.
TRIO-NO_OVERLAP	76531	g104p1	2017-06-12	cannibalism	2	no
TRIO-NO_OVERLAP	76531	g104p10	2017-06-12	alive	.	.
TRIO-NO_OVERLAP	76531	g104p11	2017-06-12	alive	.	.
TRIO-NO_OVERLAP	76531	g104p12	2017-06-12	alive	.	.
TRIO-NO_OVERLAP	76531	g104p2	2017-06-12	found_dead	1	.
TRIO-NO_OVERLAP	76531	g104p3	2017-06-12	alive	.	.
TRIO-NO_OVERLAP	76531	g104p4	2017-06-12	alive	.	.
TRIO-NO_OVERLAP	76531	g104p5	2017-06-12	alive	.	.
TRIO-NO_OVERLAP	76531	g104p6	2017-06-12	alive	.	.
TRIO-NO_OVERLAP	76531	g104p7	2017-06-12	alive	.	.
TRIO-NO_OVERLAP	76531	g104p8	2017-06-12	alive	.	.
TRIO-NO_OVERLAP	76531	g104p9	2017-06-12	alive	.	.
TRIO-NO_OVERLAP	74420	g105p1	2017-06-12	found_dead	0	.
TRIO-NO_OVERLAP	74420	g105p2	2017-06-12	alive	.	.
TRIO-NO_OVERLAP	74420	g105p3	2017-06-12	alive	.	.
TRIO-NO_OVERLAP	74420	g105p4	2017-06-12	alive	.	.
TRIO-NO_OVERLAP	74420	g105p5	2017-06-12	alive	.	.
TRIO-NO_OVERLAP	74420	g105p6	2017-06-12	alive	.	.
TRIO-NO_OVERLAP	74420	g105p7	2017-06-12	alive	.	.
TRIO-NO_OVERLAP	74420	g105p8	2017-06-12	alive	.	.
TRIO-NO_OVERLAP	69774	g108p1	2017-06-14	cannibalism	0	no
TRIO-NO_OVERLAP	69774	g108p2	2017-06-14	cannibalism	0	no
TRIO-NO_OVERLAP	69774	g108p3	2017-06-14	alive	.	.
TRIO-NO_OVERLAP	69774	g108p4	2017-06-14	alive	.	.
TRIO-NO_OVERLAP	69774	g108p5	2017-06-14	alive	.	.
TRIO-NO_OVERLAP	69774	g108p6	2017-06-14	alive	.	.
TRIO-NO_OVERLAP	69774	g108p7	2017-06-14	alive	.	.
TRIO-NO_OVERLAP	69774	g108p8	2017-06-14	alive	.	.
TRIO-NO_OVERLAP	69774	g108p9	2017-06-14	alive	.	.
TRIO-OVERLAP	71021	g3p1	2017-04-07	alive	.	.
TRIO-OVERLAP	71021	g3p2	2017-04-07	alive	.	.
TRIO-OVERLAP	71021	g3p3	2017-04-07	alive	.	.
TRIO-OVERLAP	71021	g3p4	2017-04-07	alive	.	.
TRIO-OVERLAP	71021	g3p5	2017-04-07	alive	.	.
TRIO-OVERLAP	71021	g3p6	2017-04-07	alive	.	.
TRIO-OVERLAP	71021	g3p7	2017-04-07	alive	.	.
TRIO-OVERLAP	71021	g3p8	2017-04-07	alive	.	.
TRIO-OVERLAP	70421	g7p1	2017-03-31	cannibalism	0	yes
TRIO-OVERLAP	70421	g7p2	2017-03-31	found_dead	0	.
TRIO-OVERLAP	70421	g7p3	2017-03-31	alive	.	.
TRIO-OVERLAP	70421	g7p4	2017-03-31	alive	.	.
TRIO-OVERLAP	70421	g7p5	2017-03-31	alive	.	.
TRIO-OVERLAP	70421	g7p6	2017-03-31	alive	.	.
TRIO-OVERLAP	70421	g7p7	2017-03-31	alive	.	.
TRIO-OVERLAP	70421	g7p8	2017-03-31	alive	.	.
TRIO-OVERLAP	66460	g11p1	2017-03-27	cannibalism	0	invisible
TRIO-OVERLAP	66460	g11p2	2017-03-27	cannibalism	1	invisible
TRIO-OVERLAP	66460	g11p3	2017-03-27	cannibalism	1	no
TRIO-OVERLAP	66460	g11p4	2017-03-27	found_dead	1	.
TRIO-OVERLAP	66460	g11p5	2017-03-27	found_dead	1	.
TRIO-OVERLAP	66460	g11p6	2017-03-27	found_dead	1	.
TRIO-OVERLAP	69339	g12p1	2017-03-31	cannibalism	0	invisible
TRIO-OVERLAP	69339	g12p2	2017-03-31	cannibalism	0	invisible
TRIO-OVERLAP	69339	g12p3	2017-03-31	cannibalism	1	no
TRIO-OVERLAP	69339	g12p4	2017-03-31	cannibalism	1	no
TRIO-OVERLAP	69339	g12p5	2017-03-31	cannibalism	1	no
TRIO-OVERLAP	69339	g12p6	2017-03-31	cannibalism	1	no
TRIO-OVERLAP	69339	g12p7	2017-03-31	cannibalism	1	no
TRIO-OVERLAP	69339	g12p8	2017-03-31	cannibalism	1	no
TRIO-OVERLAP	69339	g12p9	2017-03-31	found_dead	0	.
TRIO-OVERLAP	71892	g32p11	2017-04-20	alive	.	.
TRIO-OVERLAP	71892	g32p13	2017-04-20	alive	.	.
TRIO-OVERLAP	71892	g32p15	2017-04-20	alive	.	.
TRIO-OVERLAP	71892	g32p17	2017-04-20	alive	.	.
TRIO-OVERLAP	71892	g32p19	2017-04-20	alive	.	.
TRIO-OVERLAP	71892	g32p2	2017-04-20	cannibalism	0	no
TRIO-OVERLAP	71892	g32p3	2017-04-20	cannibalism	0	probable
TRIO-OVERLAP	71892	g32p5	2017-04-20	cannibalism	0	not_detected
TRIO-OVERLAP	71892	g32p7	2017-04-20	cannibalism	0	not_detected
TRIO-OVERLAP	71892	g32p8	2017-04-20	alive	.	.
TRIO-OVERLAP	67039	g34p1	2017-04-19	cannibalism	0	no
TRIO-OVERLAP	67039	g34p11	2017-04-19	found_dead	1	.
TRIO-OVERLAP	67039	g34p13	2017-04-19	found_dead	1	.
TRIO-OVERLAP	67039	g34p2	2017-04-19	cannibalism	0	no
TRIO-OVERLAP	67039	g34p4	2017-04-19	cannibalism	1	no
TRIO-OVERLAP	67039	g34p6	2017-04-19	cannibalism	2	no
TRIO-OVERLAP	67039	g34p8	2017-04-19	cannibalism	2	no
TRIO-OVERLAP	69339	g37p1	2017-04-23	cannibalism	0	yes
TRIO-OVERLAP	69339	g37p2	2017-04-23	cannibalism	0	probable
TRIO-OVERLAP	69339	g37p3	2017-04-23	cannibalism	0	probable
TRIO-OVERLAP	69339	g37p4	2017-04-23	cannibalism	0	probable
TRIO-OVERLAP	69339	g37p5	2017-04-23	cannibalism	1	invisible
TRIO-OVERLAP	69339	g37p6	2017-04-23	cannibalism	1	not_detected
TRIO-OVERLAP	69339	g37p7	2017-04-23	cannibalism	1	invisible
TRIO-OVERLAP	69339	g37p8	2017-04-23	cannibalism	1	invisible
TRIO-OVERLAP	69339	g37p9	2017-04-23	found_dead	1	.
TRIO-OVERLAP	71482	g44p1	2017-04-27	cannibalism	0	no
TRIO-OVERLAP	71482	g44p2	2017-04-27	cannibalism	0	no
TRIO-OVERLAP	71482	g44p3	2017-04-27	cannibalism	0	probable
TRIO-OVERLAP	71482	g44p4	2017-04-27	found_dead	0	.
TRIO-OVERLAP	71482	g44p5	2017-04-27	found_dead	0	.
TRIO-OVERLAP	71482	g44p6	2017-04-27	found_dead	0	.
TRIO-OVERLAP	71482	g44p7	2017-04-27	found_dead	0	.
TRIO-OVERLAP	71482	g44p8	2017-04-27	found_dead	0	.
TRIO-OVERLAP	71023	g46p1	2017-04-28	alive	.	.
TRIO-OVERLAP	71023	g46p10	2017-04-28	alive	.	.
TRIO-OVERLAP	71023	g46p2	2017-04-28	alive	.	.
TRIO-OVERLAP	71023	g46p3	2017-04-28	alive	.	.
TRIO-OVERLAP	71023	g46p4	2017-04-28	alive	.	.
TRIO-OVERLAP	71023	g46p5	2017-04-28	alive	.	.
TRIO-OVERLAP	71023	g46p6	2017-04-28	alive	.	.
TRIO-OVERLAP	71023	g46p7	2017-04-28	alive	.	.
TRIO-OVERLAP	71023	g46p8	2017-04-28	alive	.	.
TRIO-OVERLAP	71023	g46p9	2017-04-28	alive	.	.
TRIO-OVERLAP	71481	g52p1	2017-05-02	cannibalism	0	no
TRIO-OVERLAP	71481	g52p2	2017-05-02	cannibalism	0	no
TRIO-OVERLAP	71481	g52p3	2017-05-02	cannibalism	0	no
TRIO-OVERLAP	71481	g52p4	2017-05-02	found_dead	1	.
TRIO-OVERLAP	71481	g52p5	2017-05-02	found_dead	1	.
TRIO-OVERLAP	71481	g52p6	2017-05-02	found_dead	1	.
TRIO-OVERLAP	71481	g52p7	2017-05-02	found_dead	1	.
TRIO-OVERLAP	71481	g52p8	2017-05-02	found_dead	1	.
TRIO-OVERLAP	71481	g52p9	2017-05-02	found_dead	1	.
TRIO-OVERLAP	72492	g54p1	2017-05-04	cannibalism	0	no
TRIO-OVERLAP	72492	g54p10	2017-05-04	alive	.	.
TRIO-OVERLAP	72492	g54p2	2017-05-04	cannibalism	1	no
TRIO-OVERLAP	72492	g54p3	2017-05-04	found_dead	1	.
TRIO-OVERLAP	72492	g54p4	2017-05-04	found_dead	1	.
TRIO-OVERLAP	72492	g54p5	2017-05-04	found_dead	1	.
TRIO-OVERLAP	72492	g54p6	2017-05-04	found_dead	1	.
TRIO-OVERLAP	72492	g54p7	2017-05-04	found_dead	1	.
TRIO-OVERLAP	72492	g54p8	2017-05-04	found_dead	1	.
TRIO-OVERLAP	72492	g54p9	2017-05-04	found_dead	1	.
TRIO-OVERLAP	73162	g55p1	2017-05-05	cannibalism	0	invisible
TRIO-OVERLAP	73162	g55p11	2017-05-05	alive	.	.
TRIO-OVERLAP	73162	g55p13	2017-05-05	alive	.	.
TRIO-OVERLAP	73162	g55p15	2017-05-05	alive	.	.
TRIO-OVERLAP	73162	g55p17	2017-05-05	alive	.	.
TRIO-OVERLAP	73162	g55p2	2017-05-05	cannibalism	0	invisible
TRIO-OVERLAP	73162	g55p4	2017-05-05	cannibalism	0	no
TRIO-OVERLAP	73162	g55p6	2017-05-05	found_dead	1	.
TRIO-OVERLAP	73162	g55p8	2017-05-05	found_dead	1	.
TRIO-OVERLAP	70421	g57p1	2017-05-11	cannibalism	0	probable
TRIO-OVERLAP	70421	g57p10	2017-05-11	found_dead	0	.
TRIO-OVERLAP	70421	g57p11	2017-05-11	found_dead	0	.
TRIO-OVERLAP	70421	g57p2	2017-05-11	cannibalism	0	no
TRIO-OVERLAP	70421	g57p3	2017-05-11	cannibalism	0	yes
TRIO-OVERLAP	70421	g57p4	2017-05-11	cannibalism	0	no
TRIO-OVERLAP	70421	g57p5	2017-05-11	cannibalism	0	invisible
TRIO-OVERLAP	70421	g57p6	2017-05-11	cannibalism	0	no
TRIO-OVERLAP	70421	g57p7	2017-05-11	cannibalism	0	no
TRIO-OVERLAP	70421	g57p8	2017-05-11	cannibalism	1	no
TRIO-OVERLAP	70421	g57p9	2017-05-11	found_dead	0	.
TRIO-OVERLAP	71023	g61p1	2017-05-10	cannibalism	0	invisible
TRIO-OVERLAP	71023	g61p10	2017-05-10	found_dead	0	.
TRIO-OVERLAP	71023	g61p2	2017-05-10	cannibalism	0	no
TRIO-OVERLAP	71023	g61p3	2017-05-10	cannibalism	0	probable
TRIO-OVERLAP	71023	g61p4	2017-05-10	cannibalism	1	no
TRIO-OVERLAP	71023	g61p5	2017-05-10	cannibalism	1	no
TRIO-OVERLAP	71023	g61p6	2017-05-10	cannibalism	1	no
TRIO-OVERLAP	71023	g61p7	2017-05-10	cannibalism	1	no
TRIO-OVERLAP	71023	g61p8	2017-05-10	cannibalism	1	invisible
TRIO-OVERLAP	71023	g61p9	2017-05-10	cannibalism	0	yes
TRIO-OVERLAP	73872	g72p1	2017-05-17	cannibalism	1	invisible
TRIO-OVERLAP	73872	g72p2	2017-05-17	cannibalism	1	no
TRIO-OVERLAP	73872	g72p3	2017-05-17	cannibalism	2	not_detected
TRIO-OVERLAP	73872	g72p4	2017-05-17	found_dead	0	.
TRIO-OVERLAP	73872	g72p5	2017-05-17	alive	.	.
TRIO-OVERLAP	73872	g72p6	2017-05-17	alive	.	.
TRIO-OVERLAP	71021	g73p1	2017-05-18	cannibalism	1	no
TRIO-OVERLAP	71021	g73p2	2017-05-18	cannibalism	1	no
TRIO-OVERLAP	71021	g73p3	2017-05-18	found_dead	0	.
TRIO-OVERLAP	71021	g73p4	2017-05-18	found_dead	0	.
TRIO-OVERLAP	71021	g73p5	2017-05-18	found_dead	0	.
TRIO-OVERLAP	71021	g73p6	2017-05-18	found_dead	0	.
TRIO-OVERLAP	71021	g73p7	2017-05-18	alive	.	.
TRIO-OVERLAP	71021	g73p8	2017-05-18	alive	.	.
TRIO-OVERLAP	71021	g73p9	2017-05-18	alive	.	.
TRIO-OVERLAP	75231	g85p10	2017-05-28	alive	.	.
TRIO-OVERLAP	75231	g85p12	2017-05-28	alive	.	.
TRIO-OVERLAP	75231	g85p14	2017-05-28	alive	.	.
TRIO-OVERLAP	75231	g85p16	2017-05-28	alive	.	.
TRIO-OVERLAP	75231	g85p18	2017-05-28	alive	.	.
TRIO-OVERLAP	75231	g85p3	2017-05-28	alive	.	.
TRIO-OVERLAP	75231	g85p5	2017-05-28	alive	.	.
TRIO-OVERLAP	75231	g85p7	2017-05-28	alive	.	.
TRIO-OVERLAP	74001	g95p1	2017-06-05	cannibalism	0	invisible
TRIO-OVERLAP	74001	g95p10	2017-06-05	found_dead	1	.
TRIO-OVERLAP	74001	g95p2	2017-06-05	cannibalism	0	invisible
TRIO-OVERLAP	74001	g95p3	2017-06-05	cannibalism	0	no
TRIO-OVERLAP	74001	g95p4	2017-06-05	cannibalism	1	no
TRIO-OVERLAP	74001	g95p5	2017-06-05	cannibalism	1	no
TRIO-OVERLAP	74001	g95p6	2017-06-05	cannibalism	1	no
TRIO-OVERLAP	74001	g95p7	2017-06-05	found_dead	1	.
TRIO-OVERLAP	74001	g95p8	2017-06-05	found_dead	1	.
TRIO-OVERLAP	74001	g95p9	2017-06-05	found_dead	1	.
TRIO-OVERLAP	74056	g99p1	2017-06-07	cannibalism	0	invisible
TRIO-OVERLAP	74056	g99p2	2017-06-07	cannibalism	0	no
TRIO-OVERLAP	74056	g99p3	2017-06-07	found_dead	1	.
TRIO-OVERLAP	76563	g102p1	2017-06-09	cannibalism	1	invisible
TRIO-OVERLAP	76563	g102p10	2017-06-09	alive	.	.
TRIO-OVERLAP	76563	g102p2	2017-06-09	cannibalism	2	invisible
TRIO-OVERLAP	76563	g102p3	2017-06-09	found_dead	0	.
TRIO-OVERLAP	76563	g102p4	2017-06-09	found_dead	0	.
TRIO-OVERLAP	76563	g102p5	2017-06-09	found_dead	2	.
TRIO-OVERLAP	76563	g102p6	2017-06-09	alive	.	.
TRIO-OVERLAP	76563	g102p7	2017-06-09	alive	.	.
TRIO-OVERLAP	76563	g102p8	2017-06-09	alive	.	.
TRIO-OVERLAP	76563	g102p9	2017-06-09	alive	.	.
